# Supplementary material for: Priming in a permissive type I-C CRISPR–Cas system reveals distinct dynamics of spacer acquisition and loss
Source: PubMed Central journal article supplement — RNA. 2017 Oct;23(10):1525–38. doi: 10.1261/rna.062083.117 (PMC5602111; doi:10.1261/rna.062083.117), 2017-10
Supplement: supp_062083.117_Supplemental_FigS1.pdf [file supp_062083.117_Supplemental_FigS1.pdf]

**Supplemental Figure S1: Analyses of acquired spacers from pSp1(+), related to Figure 3.**

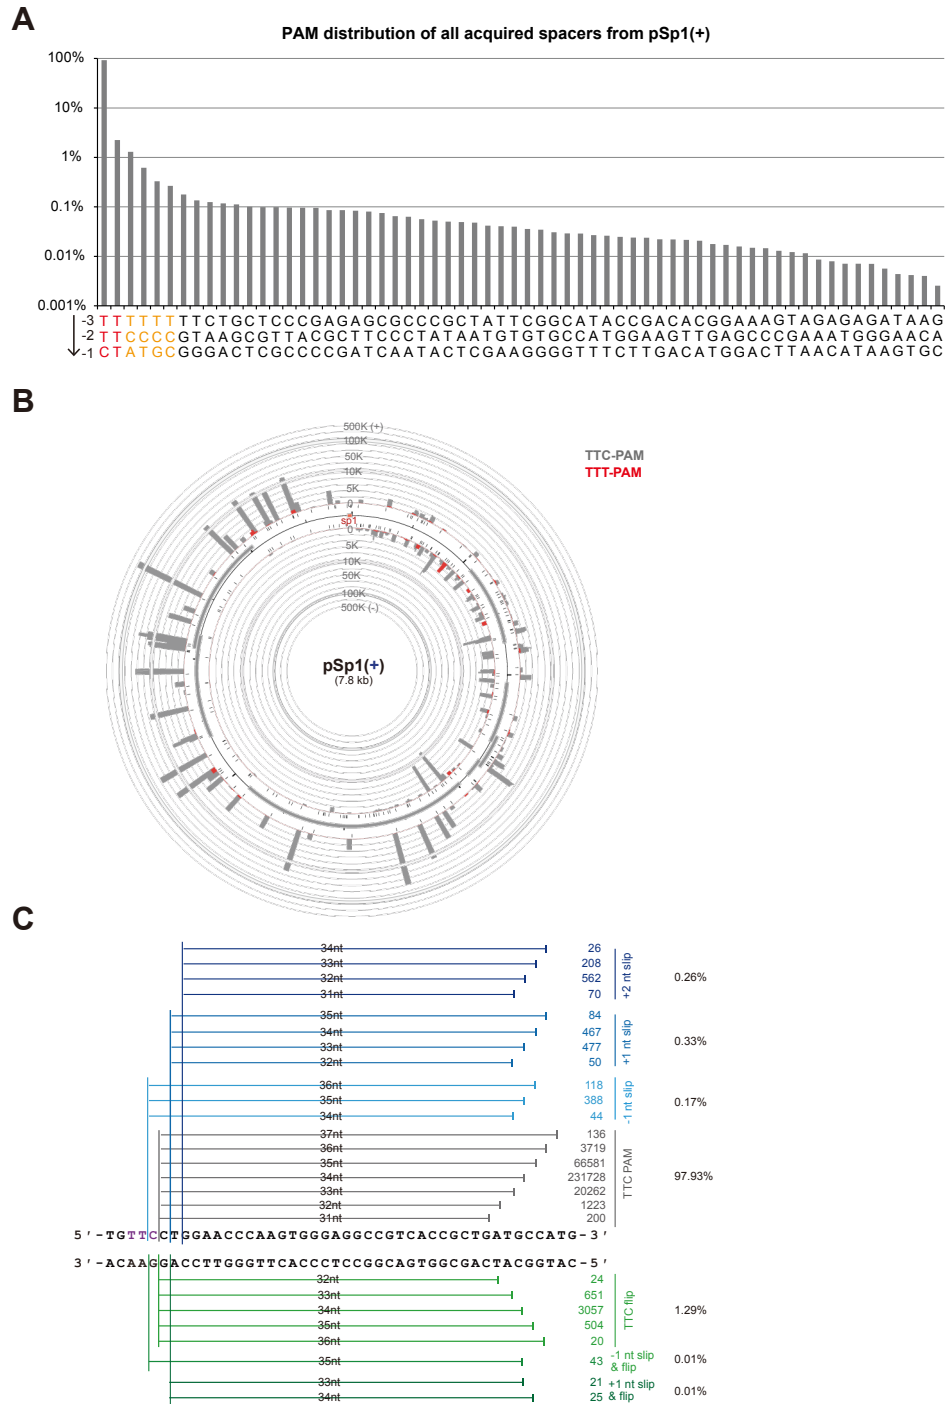

**A.** PAM frequencies of all acquired spacers derived from pSp1(+). Note that the canonical TTC and alternative TTT PAMs are the two most frequent motifs, followed by TCN motifs that are likely due to +1 nt slips. **B.** Spacers with the alternative TTT PAM (red) showed independent localizations relative to those with the canonical TTC PAM (grey). Note that the plot scale is not continuous (disrupted by grey rings) in order to fully represent a wide range of spacer acquisition efficiencies. **C.** The major spacer acquisition hotspot exemplifies imprecise size selection, slipping (blue) and flipping (green) events. Unique spacers mapped to either strand of the region were categorized and counted regarding their frequencies.
