# Supplementary material for: Priming in a permissive type I-C CRISPR–Cas system reveals distinct dynamics of spacer acquisition and loss
Source: PubMed Central journal article supplement — RNA. 2017 Oct;23(10):1525–38. doi: 10.1261/rna.062083.117 (PMC5602111; doi:10.1261/rna.062083.117), 2017-10
Supplement: supp_062083.117_Supplemental_FigS2.pdf [file supp_062083.117_Supplemental_FigS2.pdf]

**Supplemental Figure S2: Enrichment of spacer loss in a wildtype *L. pneumophila* type I-C system.**

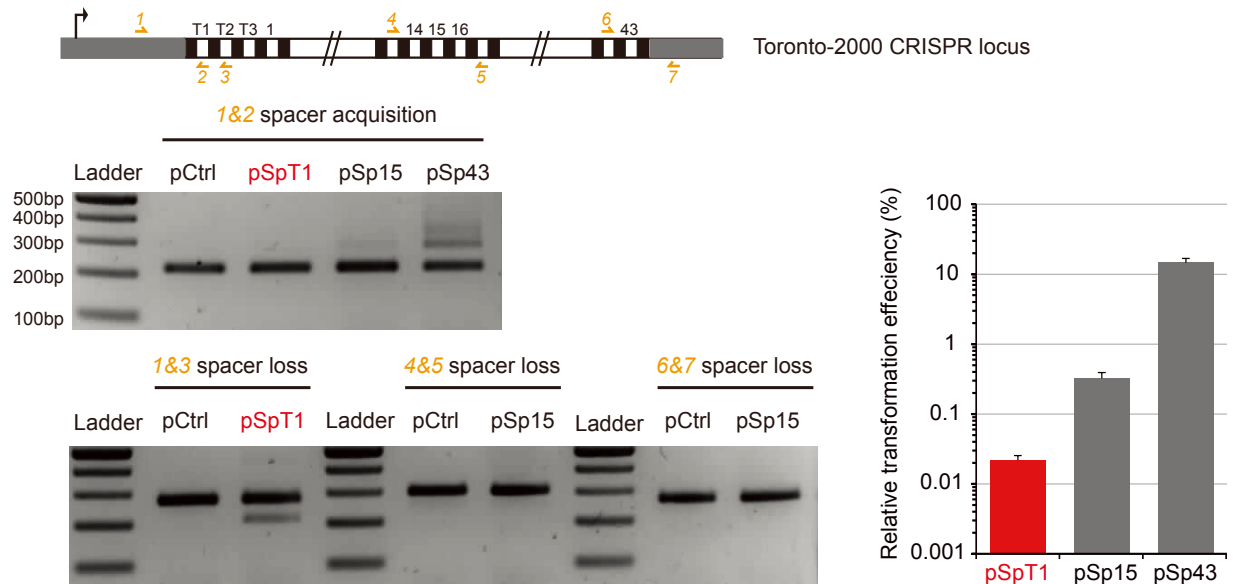

Spacer loss was also experimentally enriched for in a wildtype *Legionella pneumophila* type I-C CRISPR-Cas system (*L. pneumophila* str. Toronto-2000) where the first spacer (SpT1) is highly efficient in interference. Plasmids containing a targeted sequence for one of the three indicated spacers showed different relative transformation efficiencies in *L. pneumophila* str. Toronto-2000. The resulting transformants were tested for spacer acquisition or spacer loss by PCR using indicated primers. Error bars represent the SEM of three biological replicates.
