# Supplementary material for: Priming in a permissive type I-C CRISPR–Cas system reveals distinct dynamics of spacer acquisition and loss
Source: PubMed Central journal article supplement — RNA. 2017 Oct;23(10):1525–38. doi: 10.1261/rna.062083.117 (PMC5602111; doi:10.1261/rna.062083.117), 2017-10
Supplement: supp_062083.117_Supplemental_File_pSp1.pdf [file supp_062083.117_Supplemental_File_pSp1.pdf]

TCGGTACTGGTCGATAACATCCGCTGGCAGTCCTACCTGTCGAGCATGACCAGCGCCGAGGCCGAGGAATGGGGTGTGGACGACGACCAGCGC  
CGGTCTTCGTCCGCTTCGGTGTGAGCAAGGCCAACTATGGCGCACCGTTCGCTGATCGGTGGTTCAGGCGGCATGACGGCGGGGTGCTCAAG  
CCCCCGTGTGGAGAGGCAGCGCAAGAGCAAGGGGTGCCCGTGGTGAAGCCTAAGAACAAGCACAGCCTCAGCCACGTCCGGCAGCAGCC  
GGCGCACTGTCTGGCCCCGGCCGTTCGGTGCCTCAAGCGGGGAGCGCAAGCGCAGCAAGTGGACGTGACGTATGACTACGGCGAGCG  
CAAGCGGATCGAGTTCAGCGGCCCGAGCCGCTGGGCGCTGATGATCTGCGCATCCTGCAAGGGCTGGTGGCCATGGCTGGGCCTAATGGCCT  
AGTGCCTGGCCCCGAACCAAGACCGAAGGCGGACGGCAGCTCCGGCTGTTCCGGAACCAAGTGGGAGGCCGTCACCGCTGATGCCATGGT  
GGTCAAAGGTAGCTATCGGGCGCTGGCAAAGGAAATCGGGGCGAGGTCGATAGTGGTGGGGCGCTCAAGCACATAACAGGACTGCATCGAGCG  
CCTTTGGAAGGTATCCATCATCGCCAGAATGGCCGCAAGCGGCAGGGGTTTTCGGCTGCTGTCGGAGTACGCCAGCGACGAGGCGACGGGGC  
CCTGTACGTGGCCCTGAACCCCTTGATCGCGCAGGCCGTCATGGGTGGCGGCCAGCATGTGCGCATCAGCATGGACGAGGTGCGGGCGCTGGA  
CAGCGAAACCGCCCGCTGCTGCACCAGCGGCTGTGTGGCTGGATCGACCCCGCAAACCGGCAAGGCTTCCATAGATACCTTGTGCGGCTA  
TGTCTGGCCGTCAGAGGCCAGTGGTTCGACCATGCGCAAGCGCCGCCAGCGGGTGCAGGCGGTTGCCGGAGCTGGTTCGCGCTGGGCTGGAC  
GGTAACCGAGTTCGCGGGGGCAAGTACGACATCACCCGGCCCAAGGCGGAGGCTGACCCCCCACTCTATTGTAAACAAGACATTTTTAT  
CTTTTATATTCAATGGCTTATTTTCTGCTAATTGGTAATACCATGAAAAATACCATGCTCAGAAAAGGCTTAACAATATTTTGAAAAATTGC  
CTACTGAGCGCTGCCGCACAGCTCCATAGGCCGCTTTCCTGGCTTTGCTTCCAGATGTATGCTCTTCTGCTCCCGAACGCCAGCAAGACGTAG  
CCCAGCGCTCGGCCAGCTTGCAATTCGCGCTAACTTACATTAATTGCGTTGCGCTCACTGCCCGCTTTCAGTCGGGAAACCTGTCGTGCCA  
GCTGCATTAATGAATCGGCCAACGCGGGGAGAGCGGTTTTGCGTATTGGGCGCAGGGTGGTTTTTCTTTTACCAGTGAGACGGGCAACA  
GCTGATTGCCCTTACCGCCTGGCCCTGAGAGAGTTGCGAGCAAGCGGTCACGCTGGTTTGCCCCAGCAGGCGAAAAATCCTGTTTGATGGTGG  
TTAACGGGGGATATAACATGAGCTGTCTTCGGTATCGTCGTATCCACTACCGAGATATCCGCACCAACGCGCAGCCGGACTCGGTAATGG  
CGCGCATTGCGCCCAGCGCCATCTGATCGTTGGCAACCAGCATCGCAGTGGGAACGATGCCCTCATTCAGCATTTGCATGGTTTGTGAAAAAC  
CGGACATGGCACTCCAGTCGCCTTCCCGTTCGGCTATCGGCTGAATTTGATTGCGAGTGAGATATTTATGCCAGCCAGCCAGACGCAGACGCG  
CCGAGACAGAACTTAATGGGCCCTTC**TTAAGTCTATAGGTTGGCTAGGTTTCATCTTCCG**
